# 1 Full-mouth photoacoustic/ultrasound imaging of the periodontal 2 pocket with a compact intraoral transducer

3 Lei Fu<sup>1</sup>, Reza Khazaeinezhad<sup>2,\*</sup>, Ali Hariri<sup>2</sup>, Baiyan Qi<sup>3</sup>, Casey Chen<sup>4</sup>, Jesse V. Jokerst<sup>1,3,5,\*</sup>

4 1 Department of NanoEngineering, University of California San Diego, La Jolla, CA 92093, USA

5 2 StyloSonic LLC, Lake Forest, CA 92630, USA

6 3 Materials Science and Engineering Program, University of California San Diego, La Jolla, CA 92093, USA

7 4 Herman Ostrow School of Dentistry, University of Southern California, 925 West 34th Street, Los Angeles, CA, 90089, USA.

8 5 Department of Radiology, University of California San Diego, La Jolla, CA 92093, USA

9 \* [jjokerst@ucsd.edu](mailto:jjokerst@ucsd.edu), [reza@stylosonic.com](mailto:reza@stylosonic.com)

10 **Abstract:** Periodontitis is a public issue and imaging periodontal pocket is important to evaluate periodontitis.  
11 Regular linear transducers have limitations in imaging the posterior teeth due to their geometry restrictions. Here we  
12 characterized a transducer that can image the entire human mouth including assessment of periodontal pockets via a  
13 combination of photoacoustic and ultrasound imaging. Unlike conventional transducer design, this device has a  
14 toothbrush-shaped form factor with a side-view transducer to image molars (total size: 1 x 1.9 cm). A laser diode  
15 was integrated as the light source to reduce the cost and size and facilitates clinical transition. The *in vivo* imaging of  
16 a molar of a periodontal patient demonstrated that the transducer could image in the posterior area of gum *in vivo*;  
17 the value determined by imaging was within 7% of the value measured clinically.

18  
19 **Keywords:** Photoacoustic imaging; Periodontitis; Clinical attachment loss; Oral health; Optoacoustics

## 21 1. Introduction

22 Periodontitis is a common disease caused by subgingival bacteria that destroy the supporting structures of the teeth<sup>1</sup>.  
23 Deeper periodontal probing depths and gingival inflammation are common features of periodontitis<sup>2</sup>. Oral health  
24 professionals measure probing depths with a metallic probe placed in the pocket between the gingiva and tooth<sup>3</sup>.  
25 However, periodontal probing is subjective to the probing force, probe angulation, and the insertion point<sup>4, 5</sup>.  
26 Periodontal probing can also cause bleeding and is painful to the patient and time-consuming for the provider.

27 We previously reported photoacoustic/ultrasound imaging to image the periodontal pocket in an *ex vivo* swine model  
28 and *in vivo* human subjects<sup>6, 7</sup>. However, only anterior human teeth could be imaged because of the bulky geometry  
29 of the transducer. The handle of regular linear transducer needs to project out orthogonally from the tissue surface  
30 that is being imaged, which makes the transducer cumbersome to operate in the posterior area of gum.  
31 Unfortunately, most periodontitis occurs on posterior teeth including molars and pre-molars. Although there are  
32 clinical and small transducers e.g., endoscopic transducers that could be potentially adapted for periodontal  
33 imaging<sup>8</sup>, they usually have low central frequency at around 5 MHz, which is insufficient to resolve small structures  
34 of tooth<sup>9, 10</sup>. For this reason, it is important to develop a photoacoustic/ultrasound transducer that can image posterior  
35 teeth with high resolution. Concurrently to this, we were motivated to use a light source that is rugged and  
36 affordable. While our prior work used a Q-switched laser, such lasers are very expensive and bulky<sup>6, 7</sup>. In recently  
37 years, many groups have developed laser-diode or LED-based photoacoustic imaging system which is more portable  
38 and affordable than Q-switch laser<sup>11</sup>.

39 In this work, we characterized a compact and affordable photoacoustic/ultrasound transducer for *in vivo* full-mouth  
40 periodontal pocket imaging. The transducer has a form factor reminiscent of a toothbrush and thus can image all the  
41 human teeth *in vivo*. It integrates a 19-MHz ultrasound transducer with optical modules for photoacoustic imaging.  
42 We reduced the cost of the system by using laser diode as light source. Here, we first describe the transducer and  
43 considerations of using it to image posterior teeth. We then characterized the performance of the whole system in  
44 photoacoustic imaging. Finally, we imaged swine teeth *ex vivo* and a molar of a periodontal patient *in vivo*.

49

## 50 2. Materials and Methods

### 51 2.1 Hardware.

52 We used a high-frequency ultrasound transducer (SS-19-128, StyloSonic, USA) in a custom handpiece. It has  
53 central frequency of 19 MHz and average -6dB bandwidth of 48.9%. The transducer has 128 elements with element  
54 pitch of 78  $\mu\text{m}$ . The laser diode generates laser pulses in 1 kHz in 808 nm. The pulse energy is 0.7  $\text{mJ}/\text{cm}^2$  and the  
55 pulse width is 100 ns. A research ultrasound data acquisition system (Vantage; Verasonics, Inc., Kirkland, WA,  
56 USA) was used to receive, process, and reconstruct the photoacoustic/ultrasound signals. The Vantage system has  
57 256 channels with maximum sampling rate of 62.5 MHz. It provides output triggers to synchronize with the laser  
58 diode.

### 59 2.2 Characterization.

60 Characterizations of photoacoustic imaging used a tissue-mimicking phantom made by 20% intralipid solution. We  
61 used pencil leads (0.2 mm diameter) to evaluate light homogeneity. We used a photodetector (PE50-DIF-C, Ophir  
62 Photonics Corporation) connected with an oscilloscope (SDS 1202X-E, Siglent Inc.) to measure the light stability.  
63 Three polyethylene tubes filled with cuttlefish ink were used to evaluate the imaging depth of the transducer. A  
64 human hair (0.1 mm diameter) was used to evaluate the resolution of photoacoustic imaging. A nichrome wire (0.03  
65 mm diameter) was used to evaluate the resolution in ultrasound imaging.

### 66 2.2 Swine teeth.

67 Swine jaws were obtained from a local abattoir. One swine tooth (1<sup>st</sup> molar) was prepared for the ultrasound imaging  
68 in **Fig. 3**, and two more swine teeth (1<sup>st</sup> molar and 1<sup>st</sup> pre-molar) were prepared for photoacoustic/ultrasound  
69 imaging in **Fig. 4**.

### 70 2.3 Contrast agent.

71 The melanin nanoparticles in cuttlefish ink (Nortindal, Spain) were used as a photoacoustic contrast agent to  
72 highlight the pocket as described previously<sup>6, 7</sup>.

### 73 2.4 Periodontal pocket imaging.

74 The photoacoustic images were collected along with ultrasound data for anatomy. The photoacoustic image shows  
75 the distribution of the contrast agent in the pocket and was used to measure pocket depth. Pocket depth  
76 measurements were measured by Marquis probing method and photoacoustic method. The Marquis probe has  
77 black/white rings marking the probing depth. The probe was placed into the pocket along the direction of tooth  
78 root<sup>12</sup> for conventional probing assessment.

### 79 2.5 Participant.

80 All work with human subjects was approved by the University of California – San Diego (UCSD) and University of  
81 Southern California (USC) IRBs and conducted according to the ethical standards set forth by the IRB and the  
82 Helsinki Declaration of 1975. The participant gave written informed consent and teeth were imaged non-invasively.  
83 All subjects were >18 years old and able to provide consent. One healthy subject and one periodontal patient were  
84 recruited for this study. The imaging of periodontal patient was handled by a board-certified periodontist (author  
85 CC) at USC dental school.

86

87

88

89

90

91

92

### 93 3. Results and Discussion.

94 We first describe the device (**Fig. 1**) and characterized the performance of the transducer in photoacoustic imaging  
95 (**Fig. 2**), and then validate its performance in ultrasound imaging (**Fig. 3**). We eventually performed both *ex vivo* and  
96 *in vivo* periodontal pocket imaging (**Fig. 4**).

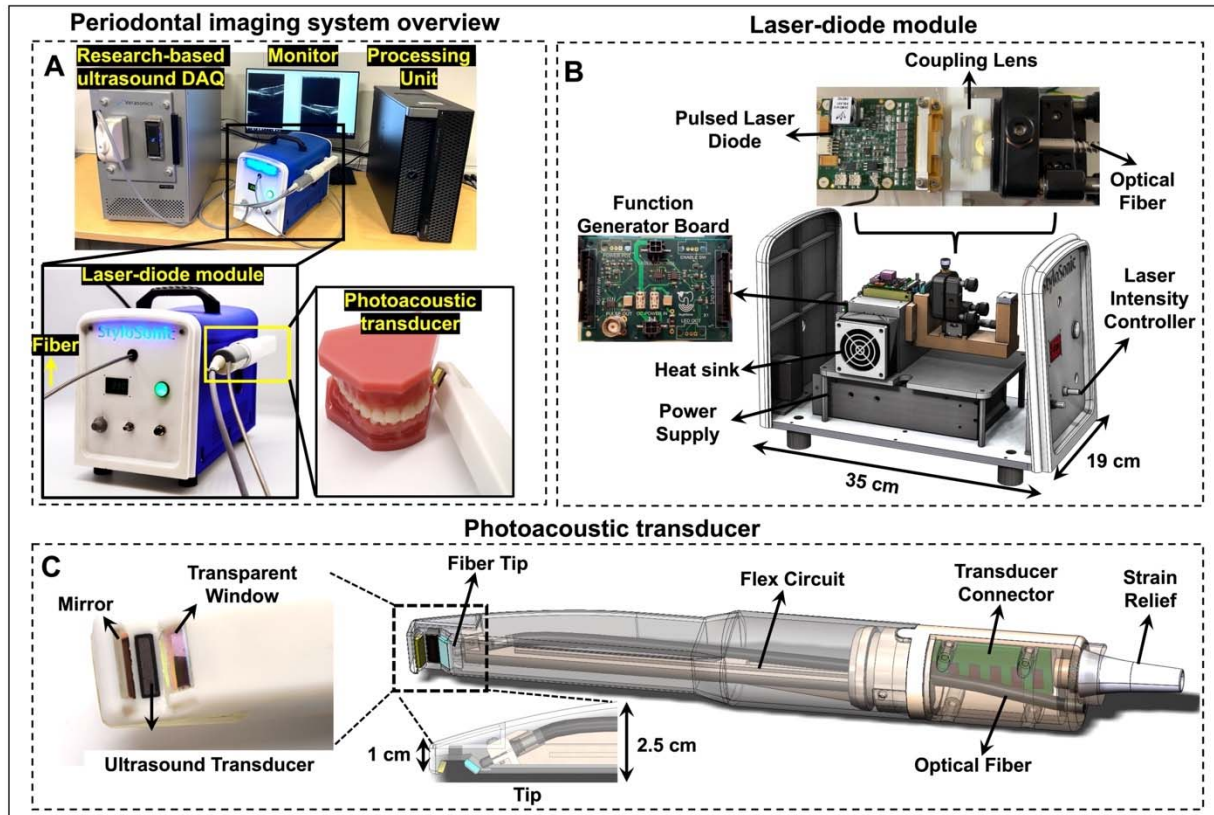

97

98 **Fig. 1. Full-mouth periodontal imaging system.** A) System overview. A laser-diode module is the light source and light  
99 pulses are delivered to the transducer via a fiber. The transducer is integrated into a handheld device. A research-based  
100 ultrasound DAQ system processed and reconstructed the photoacoustic/ultrasound signals. B) A laser-diode module houses  
101 the pulsed laser diode, coupling lens, customized function generator board, heat sink, and power supply. The front panel  
102 has the control button to adjust the laser intensity. C) The photoacoustic transducer includes an ultrasound transducer,  
103 transducer connector, flex circuit, an optical fiber, transparent window, and mirror. The small tip of the handpiece (10  
104 mm×19 mm) facilitates full-mouth scanning.

#### 105 3.1 Device.

106 The periodontal imaging system includes a photoacoustic/ultrasound imaging transducer, a laser-diode module,  
107 and a research-based ultrasound DAQ system (see Methods for configurations) (**Fig. 1(A)**). Photoacoustic imaging  
108 requires optical excitation, and the transducer integrates a transparent window and mirror for light delivery for  
109 photoacoustic imaging. This device uses a laser-diode module that delivers light to the transducer via an optical  
110 fiber. The transducer receives the photoacoustic and ultrasound signals which are processed by the DAQ system. A  
111 supplementary video is shared online that shows the operation of the system in periodontal pocket imaging (see  
112 **SM1** in Supplementary Information).

113 The laser-diode module contains a pulsed laser diode, a function generator board, coupling lens, and a heat sink  
114 (**Fig. 1(B)**). The laser-diode module's dimensions are 35 cm (length) × 19 cm (width) × 28 cm (height), and it  
115 weighs ~5 kg. The laser diode generates 1-KHz laser pulses which are coupled into the fiber and delivered remotely

116 to the transducer for photoacoustic imaging. Thus, the transducer side (**Fig. 1(C)**) does not have any light source or  
117 thermal system making the transducer more compact than that of LED-based system. Alternative LED-based  
118 photoacoustic imaging systems require the LED arrays and heatsink to be assembled on the transducer which  
119 increase the size<sup>13</sup>. The laser-diode module also provides trigger in & out channels through a function generator  
120 board for synchronization. The laser-diode module is also more compact than a regular Q-switch laser, which makes  
121 it suitable for chairside imaging<sup>14</sup>. One limitation of the laser diode is that the pulse width is 100 ns, and thus it can  
122 only generate photoacoustic signal below 10 MHz<sup>15</sup>. Thus, we used the lower half of the transducer bandwidth for  
123 photoacoustic imaging and its full bandwidth for ultrasound imaging.

124 The transducer integrates a 19-MHz ultrasound transducer (average -6dB bandwidth of 48.9%) facing towards  
125 the tissue while the handle can project out from the gum parallel to the tissue surface (**Fig. 1(C)**). This toothbrush-  
126 shaped design can image the posterior teeth in contrast to conventional transducers<sup>16, 17</sup>. The transducer also  
127 integrates a transparent window and mirror for light delivery for photoacoustic imaging.

### 128 3.2 Characterization

129 We characterized the light homogeneity, light stability, penetration depth, and resolution of the system for  
130 photoacoustic imaging. The periodontal pocket and its associated tissue are less than 10 mm across the gingiva and  
131 tooth, and less than 4 mm deep from the gingiva surface. An array of pencil leads (10 mm wide, 5 leads) was put in  
132 a phantom solution (see Methods) 8 mm below the transducer to examine the light homogeneity. Pencil leads are  
133 strong light absorber, and their photoacoustic intensity correlates well with the local light intensity<sup>18</sup>; stronger  
134 photoacoustic signal indicates stronger light focus. All five pencil leads are distinguishable in the 10-mm range in  
135 the photoacoustic image with similar intensity (**Fig. 2(A)**). **Fig. 2(A)** shows the statistics that the photoacoustic  
136 intensity of the 5 pencil leads have only 11% relative standard deviation (RSD), which indicates uniform  
137 illumination.

138 We also measured the stability of the laser diode by monitoring its intensity in one hour duration (**Fig. 2(B)**). The  
139 light intensity dropped from 0.74 mJ/cm<sup>2</sup> to 0.58 mJ/cm<sup>2</sup> in the one hour with 20% variation. Three polyethylene  
140 tubes loaded with 20  $\mu$ L contrast agent (cuttlefish ink solution) were fixed by a 3D printed holder. They were put in  
141 the phantom at different depths (7 mm, 11 mm, and 15 mm) from the transducer. The first two tubes are  
142 distinguishable while the third is barely observable with photoacoustic imaging (**Fig. 2(c)**). **Fig. 2(C)** shows that the  
143 signal-to-noise ratio (SNR) decreases with imaging depth which is expected due to light attenuation. These results  
144 demonstrate that the system can image contrast agents as deep as 11 mm in tissue with more than 10-dB SNR. The  
145 pulse energy of the laser diode is sufficient for periodontal pocket imaging (less than 4 mm deep).

146 The lateral and axial resolution of the system in photoacoustic imaging were determined by imaging the cross-  
147 section of a human hair (100- $\mu$ m diameter). We defined the FWHM (full width at half maximum) of the lateral and  
148 axial amplitude distributions as the axial and lateral resolution, respectively<sup>19</sup>. The lateral and axial amplitude  
149 distributions across the hair were extracted (**Fig. 2(D)**), and the lateral and axial resolution in photoacoustic mode  
150 were 192  $\mu$ m and 352  $\mu$ m, respectively. The lateral and axial resolution values in ultrasound-only mode were 142  
151  $\mu$ m and 102  $\mu$ m by imaging a 30- $\mu$ m nichrome wire.

152  
153  
154  
155  
156

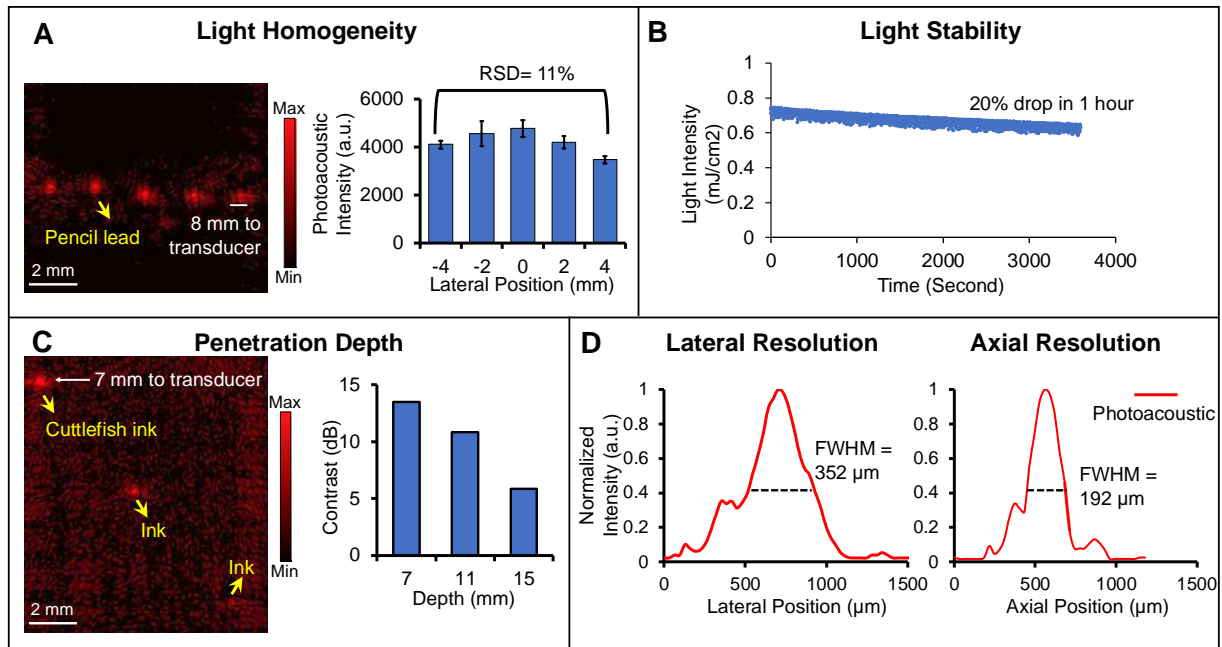

157

158

159

160

161

162

163

164

**Fig. 2 Performance characterization of the periodontal imaging transducer.** A) Light homogeneity evaluation. Photoacoustic imaging of five pencil leads placed parallel over 10 mm and 8 mm under the transducer. The chart shows the relative standard deviation (RSD) of the photoacoustic intensity of the five pencil leads. B) Laser-diode power stability versus time in 1-hour scale. C) Imaging depth evaluation. Three tubes containing the contrast agent are put in a tissue mimic phantom located at different depths of 7 mm, 11 mm, and 15 mm from the transducer. The right chart shows the SNRs of the three tubes. D) The lateral and axial photoacoustic amplitude distributions along a 100-µm hair: 352 µm and 192 µm are the lateral and axial resolution in photoacoustic mode, respectively.

165

### 3.2 Ultrasound imaging of swine and human teeth.

166

167

168

169

170

171

172

173

174

175

176

177

We next evaluated the performance of the transducer in tooth in ultrasound mode. One swine tooth and two human teeth were imaged *ex vivo* and *in vivo*, respectively. Swine teeth are a common model because they have a similar structure as human teeth<sup>20</sup>. The transducer resolves the structures in both the swine tooth imaging (1<sup>st</sup> molar, **Fig. 3(a)**) and the human tooth imaging (Cuspid #6, **Fig. 3(b)**) including gingival surface, tooth surface (occlusal surface), gingival margin, alveolar bone, and alveolar bone crest (ABC). The tooth surface has stronger ultrasound intensity because it has higher impedance than other tissue. Moreover, the cemento-enamel junction (CEJ) is distinguishable in the human tooth (**Fig. 3(b)**). Resolving these structures and their positions are very helpful to the diagnosis of periodontal diseases<sup>12</sup>. Moreover, we imaged the 1<sup>st</sup> molar of a human subject (**Fig. 3(c)**) *in vivo*. Those structures labeled in **Fig. 3(a)** and **3(b)** are also observable in **Fig. 3(c)**, which demonstrated that the toothbrush-shaped transducer can operate in the posterior area to image molars *in vivo*, which could be a big challenge for other ultrasound transducers.

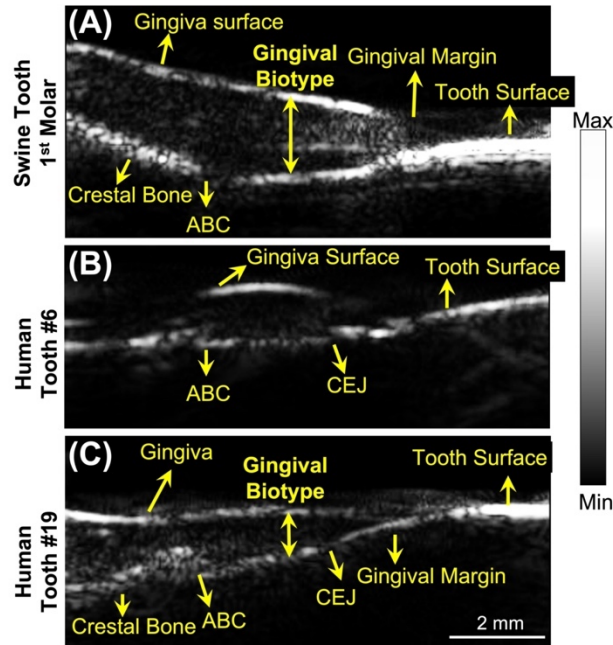

177

178

179

180

**Fig. 3 Ultrasound imaging of swine and human teeth.** A-C are ultrasound images of a swine 1<sup>st</sup> pre-molar (A), a human cuspid #6 (B), and a human 1<sup>st</sup> molar #19 (C). All the images are in sagittal view. Alveolar bone crest (ABC). Cementoenamel junction (CEJ).

181

182

183

184

185

186

187

188

189

190

191

192

193

We performed photoacoustic/ultrasound dual-mode imaging to resolve the periodontal pockets both *ex vivo* and *in vivo*. We used a cuttlefish ink solution as photoacoustic contrast agent which highlights the pocket area. The ultrasound image in grayscale shows the tooth structure, and photoacoustic image in red scale reveals the contrast agent i.e., the periodontal pocket. Photoacoustic/ultrasound images are overlaid together. Two swine teeth (1<sup>st</sup> pre-molar and 1<sup>st</sup> molar) were imaged *ex vivo* (**Fig. 4(A)**) and a molar of a periodontal patient was imaged *in vivo* (**Fig. 4(B)**). **Fig. 4(A)** shows the photoacoustic/ultrasound images of the two swine teeth before applying the contrast agent (left panels) and after (right panels). Clearly, there is no photoacoustic signal in the periodontal pocket before applying the contrast agent (Left panels). The photoacoustic signal from the 1<sup>st</sup> pre-molar image was caused by the tooth stain as shown in the inset photo. After applying the contrast agent, the contrast agent is seen as a line below the gingival margin, i.e., the periodontal pocket. This confirms that the photoacoustic transducer can detect the periodontal pocket *ex vivo*. By drawing a line between the gingival margin in the ultrasound image and the contrast end in the pocket in the photoacoustic image, we measured the pocket depth to be 2.3 mm for the 1<sup>st</sup> molar and 4.0 mm for the 1<sup>st</sup> pre-molar, which is close to 2 mm and 4 mm respectively by using a clinical periodontal probe.

194

195

196

197

198

199

200

201

202

203

204

We further imaged the 1<sup>st</sup> molar #14 of a periodontal patient (**Fig. 4(B)**). The diseased patient was diagnosed with stage 2, grade B periodontitis. Tooth #14 was characterized via conventional probing. The probing pocket depth (PPD) depths were (from distal to medial to mesial) 4-3-5 mm on the buccal side and 4-3-6 mm on the lingual. The Clinical attachment level (CAL) buccal (from distal to medial to mesial) was 4-3-5 mm, and the CAL lingual was 4-3-6 mm. Similar to the swine teeth, the photoacoustic signal shows up in the pocket after applying the contrast agent (**Fig. 4(B)**). **Fig. 4(B)** also shows the line distributions of the photoacoustic signal across the pocket. As can be seen, the pocket area has much stronger photoacoustic intensity (Red line) after applying the contrast agent. The pocket depth is measured as 2.8 mm (medial, buccal side). Importantly, our imaging assessment of the probing depth occurred medially is within 7% of the value (3 mm) determined by using a periodontal probe invasively. The results demonstrate that the transducer can image the periodontal pocket of molars *in vivo*.

205

206

207

208

209

Besides periodontal pocket, gingival inflammation also occurs with periodontal disease<sup>21</sup>. It is expected the inflamed tissue is well perfused and hence has more blood signal than healthy tissue (poorly perfused), which can be detected by imaging the hemoglobin by photoacoustic imaging. We performed photoacoustic imaging of the well perfused tissue and poorly perfused (healthy) tissue of the swine tooth model, separately (**Fig. 4(C). i**). As can be seen, well perfused tissue has much stronger PA signal close to the gingiva surface (**Fig. 4(C). ii**) than poorly tissue

210 (Fig. 4(C). iii). The statistics in Fig. 4(C). iv shows that the overall photoacoustic intensity of the well perfused  
 211 tissue is around two times higher than the poorly perfused tissue.  
 212

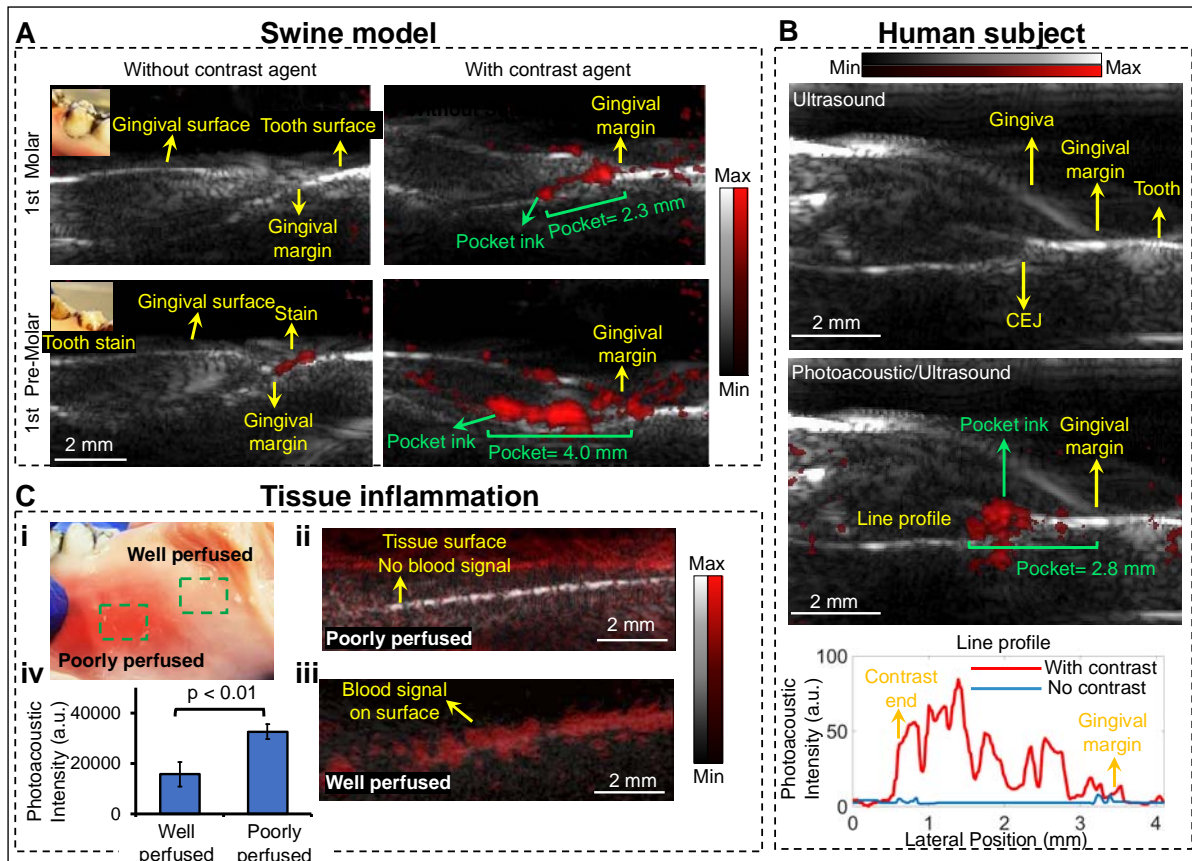

213  
 214 **Fig. 4. Periodontal pocket and gingiva inflammation imaging.** A) Pocket depth measurement of two swine teeth before  
 215 and after using the contrast agent. The insets show stains on tooth. Photoacoustic image in red scale is overlaid to  
 216 ultrasound image in gray scale. B) Pocket depth measurement of 1<sup>st</sup> molar #14 of a periodontal patient. The top panel is an  
 217 ultrasound image of the molar. The middle panel is the photoacoustic/ultrasound image after applying the contrast agent.  
 218 The bottom panel shows the line profile of the photoacoustic intensity in the pocket. C) Inflammation imaging. Panel i  
 219 shows the swine gingiva with well-perfused tissue and poorly perfused tissue. Panel ii shows a photoacoustic/ultrasound  
 220 image of the poorly perfused tissue. Panel iii shows photoacoustic/ultrasound image of the well-perfused tissue. Panel iv is  
 221 the statistics that shows the overall photoacoustic intensity of healthy tissue (poorly perfused) and inflamed tissue (well  
 222 perfused).

223  
 224 **4. Conclusion**

225 In conclusion, we evaluated a tooth-brushed-shaped photoacoustic/ultrasound transducer for full-mouth periodontal  
 226 pocket imaging. The unique tooth-brush design allows the transducer to fit in the posterior area of gum and image  
 227 molars. The device uses a laser diode as the light source to reduces the costs. We performed *ex vivo* swine teeth  
 228 imaging and *in vivo* periodontal patient imaging. The results demonstrated the transducer can image the periodontal  
 229 pocket in molars *in vivo*.

230  
 231 **5. Back matter**

232 **5.1 Funding**

233 A.H. and R.K. acknowledge R43 DE031196. J.V.J acknowledges R21 DE029025 and UL1 TR001442.

234

235 5.2 Disclosures.

236 R.K., A.H., and J.V.J. are co-founders of StyloSonic, LLC.  
237

238 5.3 Data availability.

239 Data can be requested from the authors at any time. A supplementary video is shared in the supporting information  
240 that shows the operation of the system in periodontal pocket imaging.  
241

## 242 6. References

- 243 1. NHNES OH-5 Reduce the proportion of adults aged 45 to 74 years with moderate or severe periodontitis.  
244 <https://www.healthypeople.gov/2020/data/Chart/5026?category=1&by=Total&fips=-1>.
- 245 2. Farook, F. F.; Alodwene, H.; Alharbi, R.; Alyami, M.; Alshahrani, A.; Almohammadi, D.; Alnasyan,  
246 B.; Aboelmaaty, W., Reliability assessment between clinical attachment loss and alveolar bone level in dental  
247 radiographs. *Clin Exp Dent Res* 2020, 6 (6), 596-601.
- 248 3. Khan, S.; Cabanilla, L. L., Periodontal probing depth measurement: a review. *Compend Contin Educ Dent*  
249 2009, 30 (1), 12-4, 16, 18-21; quiz 22, 36.
- 250 4. Larsen, C.; Barendregt, D. S.; Slot, D. E.; Van der Velden, U.; Van der Weijden, F., Probing pressure, a  
251 highly undervalued unit of measure in periodontal probing: a systematic review on its effect on probing pocket  
252 depth. *J Clin Periodontol* 2009, 36 (4), 315-22.
- 253 5. Biddle, A. J.; Palmer, R. M.; Wilson, R. F.; Watts, T. L., Comparison of the validity of periodontal  
254 probing measurements in smokers and non-smokers. *J Clin Periodontol* 2001, 28 (8), 806-12.
- 255 6. Moore, C.; Bai, Y.; Hariri, A.; Sanchez, J. B.; Lin, C. Y.; Koka, S.; Sedghizadeh, P.; Chen, C.; Jokerst,  
256 J. V., Photoacoustic imaging for monitoring periodontal health: A first human study. *Photoacoustics* 2018, 12, 67-  
257 74.
- 258 7. Lin, C. Y.; Chen, F.; Hariri, A.; Chen, C. J.; Wilder-Smith, P.; Takesh, T.; Jokerst, J. V., Photoacoustic  
259 Imaging for Noninvasive Periodontal Probing Depth Measurements. *J Dent Res* 2018, 97 (1), 23-30.
- 260 8. Giovannini, M.; Ardizzone, S., Anorectal ultrasound for neoplastic and inflammatory lesions. *Best Pract*  
261 *Res Cl Ga* 2006, 20 (1), 113-135.
- 262 9. Nguyen, K. C. T.; Le, L. H.; Kaipatur, N. R.; Zheng, R.; Lou, E. H.; Major, P. W., High-Resolution  
263 Ultrasonic Imaging of Dento-Periodontal Tissues Using a Multi-Element Phased Array System. *Annals of*  
264 *Biomedical Engineering* 2016, 44 (10), 2874-2886.
- 265 10. Nguyen, K. C. T.; Le, B. M.; Li, M. X.; Almeida, F. T.; Major, P. W.; Kaipatur, N. R.; Lou, E. H. M.;  
266 Punithakumar, K.; Le, L. H., Localization of cemento-enamel junction in intraoral ultrasonographs with machine  
267 learning. *Journal of Dentistry* 2021, 112.
- 268 11. Fatima, A.; Kratkiewicz, K.; Manwar, R.; Zafar, M.; Zhang, R. Y.; Huang, B.; Dadashzadeh, N.; Xia,  
269 J.; Avanaki, K., Review of cost reduction methods in photoacoustic computed tomography. *Photoacoustics* 2019, 15.
- 270 12. Hsun-Liang (Albert) Chan, O. D. K., *Dental Ultrasound in Periodontology and Implantology*. Springer  
271 2020.
- 272 13. Hariri, A.; Lemaster, J.; Wang, J. X.; Jeevarathinam, A. S.; Chao, D. L.; Jokerst, J. V., The  
273 characterization of an economic and portable LED-based photoacoustic imaging system to facilitate molecular  
274 imaging. *Photoacoustics* 2018, 9, 10-20.
- 275 14. Erfanzadeh, M.; Zhu, Q., Photoacoustic imaging with low-cost sources; A review. *Photoacoustics* 2019, 14,  
276 1-11.
- 277 15. Agano, T.; Sato, N.; Awazu, K., LED-based photoacoustic imaging system - why it achieves the same  
278 signal to noise ratio as solid-state-laser-based system; A review. *Photons Plus Ultrasound: Imaging and Sensing*  
279 2020 2020, 11240.



- 280 16. Sinjab, K.; Kripfgans, O. D.; Ou, A.; Chan, H. L., Ultrasonographic evaluation of edentulous crestal bone  
281 topography: A proof-of-principle retrospective study. *Oral Surg Oral Med Oral Pathol Oral Radiol* 2022, 133 (1),  
282 110-117.
- 283 17. Tattan, M.; Sinjab, K.; Lee, E.; Arnett, M.; Oh, T. J.; Wang, H. L.; Chan, H. L.; Kripfgans, O. D.,  
284 Ultrasonography for chairside evaluation of periodontal structures: A pilot study. *J Periodontol* 2020, 91 (7), 890-  
285 899.
- 286 18. Hariri, A.; Alipour, K.; Mantri, Y.; Schulze, J. P.; Jokerst, J. V., Deep learning improves contrast in low-  
287 fluence photoacoustic imaging. *Biomed Opt Express* 2020, 11 (6), 3360-3373.
- 288 19. Li, X.; Wei, W.; Zhou, Q.; Shung, K. K.; Chen, Z., Intravascular photoacoustic imaging at 35 and 80  
289 MHz. *J Biomed Opt* 2012, 17 (10), 106005.
- 290 20. Tsiolis, F. I.; Needleman, I. G.; Griffiths, G. S., Periodontal ultrasonography. *J Clin Periodontol* 2003, 30  
291 (10), 849-54.
- 292 21. Page, R. C.; Schroeder, H. E., Pathogenesis of inflammatory periodontal disease. A summary of current  
293 work. *Lab Invest* 1976, 34 (3), 235-49.
- 294  
295
